# Supplementary material for: A New Robust Classifier on Noise Domains: Bagging of Credal C4.5 Trees
Source: Hindawi journal article supplement (doi:10.1155/2017/9023970), 2017-01-01
Supplement: f1 [file 9023970.f1.pdf]

## Appendix

### **1 Experimental results using Random Forest with 500 trees**

Table 1: Accuracy results of the methods when they are used on data sets without added noise.

| Data set                   | BA-C4.5-U | BA-CDT-U | BA-CC4.5-U | BA-C4.5 | BA-CDT | BA-CC4.5 | RF    |
|----------------------------|-----------|----------|------------|---------|--------|----------|-------|
| anneal                     | 98.90     | 98.89    | 98.65      | 98.79   | 98.59  | 98.78    | 99.67 |
| arrhythmia                 | 75.35     | 74.49    | 75.16      | 75.04   | 74.36  | 75.09    | 68.94 |
| audiology                  | 81.83     | 80.41    | 82.03      | 80.75   | 74.35  | 82.08    | 80.05 |
| autos                      | 85.45     | 80.27    | 79.28      | 84.39   | 72.65  | 78.98    | 84.48 |
| balance-scale              | 81.56     | 82.41    | 82.65      | 82.39   | 83.82  | 82.65    | 80.55 |
| breast-cancer              | 70.43     | 70.35    | 72.84      | 73.09   | 72.35  | 73.73    | 69.88 |
| wisconsin-breast-cancer    | 96.45     | 96.14    | 96.31      | 96.32   | 95.85  | 96.14    | 96.61 |
| car                        | 94.33     | 93.55    | 93.30      | 93.65   | 91.24  | 93.04    | 94.86 |
| cmc                        | 52.19     | 53.21    | 53.92      | 53.12   | 56.02  | 54.09    | 50.44 |
| horse-colic                | 85.51     | 84.91    | 85.40      | 85.21   | 85.21  | 85.48    | 85.83 |
| credit-rating              | 85.68     | 86.07    | 86.84      | 86.14   | 86.16  | 86.43    | 85.87 |
| german-credit              | 73.01     | 74.64    | 73.96      | 74.73   | 75.26  | 74.84    | 76.12 |
| dermatology                | 97.13     | 94.18    | 96.77      | 96.61   | 93.63  | 96.23    | 97.05 |
| pima-diabetes              | 76.14     | 75.80    | 75.94      | 76.17   | 75.92  | 75.90    | 75.78 |
| ecoli                      | 84.88     | 83.82    | 84.34      | 84.70   | 83.75  | 84.49    | 84.88 |
| Glass                      | 74.49     | 75.51    | 72.66      | 74.96   | 73.31  | 72.80    | 79.90 |
| haberman                   | 70.17     | 73.76    | 74.25      | 72.95   | 73.47  | 73.89    | 65.32 |
| cleveland-14-heart-disease | 80.23     | 78.68    | 80.13      | 79.90   | 80.39  | 80.20    | 81.52 |
| hungarian-14-heart-disease | 78.92     | 81.18    | 82.88      | 79.87   | 82.09  | 82.88    | 81.17 |
| heart-statlog              | 80.96     | 81.41    | 82.26      | 81.19   | 82.33  | 82.19    | 83.04 |
| hepatitis                  | 81.76     | 80.99    | 82.09      | 81.37   | 81.57  | 81.90    | 83.64 |
| hypothyroid                | 99.62     | 99.59    | 99.59      | 99.61   | 99.55  | 99.58    | 99.56 |
| ionosphere                 | 92.57     | 91.23    | 91.74      | 92.54   | 90.77  | 91.74    | 93.37 |
| iris                       | 94.47     | 95.07    | 94.40      | 94.47   | 94.80  | 94.40    | 94.20 |
| kr-vs-kp                   | 99.46     | 99.40    | 99.46      | 99.44   | 98.92  | 99.45    | 99.30 |
| letter                     | 94.03     | 92.44    | 93.48      | 93.86   | 90.80  | 93.45    | 96.75 |
| liver-disorders            | 73.42     | 72.21    | 71.02      | 73.25   | 71.31  | 70.76    | 72.52 |
| lymphography               | 79.96     | 76.24    | 79.47      | 79.69   | 77.51  | 79.74    | 83.76 |
| mfeat-pixel                | 83.86     | 87.20    | 84.40      | 83.60   | 87.04  | 84.37    | 96.83 |
| nursery                    | 98.68     | 96.66    | 96.53      | 97.41   | 95.90  | 96.51    | 99.26 |
| optdigits                  | 95.84     | 95.55    | 95.84      | 95.79   | 94.74  | 95.83    | 98.50 |
| page-blocks                | 97.36     | 97.32    | 97.33      | 97.37   | 97.29  | 97.38    | 97.48 |
| pendigits                  | 98.32     | 98.45    | 98.12      | 98.25   | 98.15  | 98.10    | 99.23 |
| primary-tumor              | 44.22     | 43.93    | 44.11      | 44.93   | 41.98  | 44.52    | 44.19 |
| segment                    | 97.75     | 97.45    | 97.22      | 97.64   | 96.74  | 97.21    | 98.16 |
| sick                       | 98.97     | 98.97    | 98.91      | 98.85   | 98.54  | 98.84    | 98.45 |
| solar-flare2               | 99.49     | 99.53    | 99.53      | 99.53   | 99.53  | 99.53    | 99.45 |
| sonar                      | 80.07     | 80.78    | 78.86      | 80.40   | 77.57  | 78.77    | 84.87 |
| soybean                    | 92.28     | 90.47    | 92.37      | 93.10   | 88.81  | 92.37    | 93.76 |
| spambase                   | 94.73     | 94.65    | 94.30      | 94.58   | 93.98  | 94.24    | 95.75 |
| spectrometer               | 56.61     | 54.48    | 54.58      | 56.53   | 52.91  | 54.57    | 57.99 |
| splice                     | 94.70     | 94.40    | 94.84      | 94.68   | 94.06  | 94.71    | 96.57 |
| Sponge                     | 93.91     | 92.63    | 93.88      | 92.63   | 92.50  | 92.63    | 95.00 |
| tae                        | 60.88     | 60.88    | 54.85      | 59.43   | 57.56  | 55.18    | 68.25 |
| vehicle                    | 75.22     | 74.78    | 74.47      | 75.17   | 73.06  | 74.49    | 74.63 |
| vote                       | 96.78     | 96.34    | 96.62      | 96.69   | 95.52  | 96.69    | 96.59 |
| vowel                      | 94.04     | 92.17    | 90.66      | 92.64   | 88.96  | 90.68    | 98.42 |
| waveform                   | 83.40     | 83.51    | 83.08      | 83.35   | 83.31  | 83.08    | 85.41 |
| wine                       | 95.34     | 95.84    | 94.89      | 95.23   | 95.10  | 94.89    | 97.63 |
| zoo                        | 92.80     | 92.40    | 92.90      | 92.50   | 92.61  | 92.90    | 96.15 |
| Average                    | 85.28     | 84.90    | 84.98      | 85.29   | 84.24  | 84.97    | 86.35 |

Table 2: Accuracy results of the methods when they are used on data sets with a percentage of added noise equal to 10%.

| Data set                   | BA-C4.5-U | BA-CDT-U | BA-CC4.5-U | BA-C4.5 | BA-CDT | BA-CC4.5 | RF    |
|----------------------------|-----------|----------|------------|---------|--------|----------|-------|
| anneal                     | 98.05     | 98.50    | 98.45      | 98.64   | 98.36  | 98.59    | 96.48 |
| arrhythmia                 | 74.29     | 73.88    | 74.85      | 74.40   | 73.28  | 74.93    | 68.03 |
| audiology                  | 80.84     | 79.28    | 81.27      | 81.01   | 75.68  | 81.13    | 75.89 |
| autos                      | 80.44     | 75.79    | 77.56      | 79.99   | 67.43  | 77.18    | 77.16 |
| balance-scale              | 81.09     | 81.97    | 82.67      | 82.22   | 83.84  | 82.71    | 77.98 |
| breast-cancer              | 67.17     | 69.87    | 70.93      | 72.04   | 71.44  | 72.74    | 66.20 |
| wisconsin-breast-cancer    | 95.49     | 95.75    | 96.24      | 95.81   | 96.11  | 96.27    | 94.94 |
| car                        | 90.92     | 92.34    | 92.29      | 91.98   | 90.94  | 92.08    | 93.32 |
| cmc                        | 50.12     | 51.82    | 52.78      | 51.56   | 54.75  | 53.22    | 48.80 |
| horse-colic                | 84.55     | 83.71    | 84.93      | 85.07   | 84.64  | 84.96    | 83.85 |
| credit-rating              | 83.30     | 84.77    | 86.12      | 85.87   | 85.80  | 85.97    | 84.16 |
| german-credit              | 72.67     | 73.43    | 73.09      | 73.92   | 74.66  | 73.78    | 75.09 |
| dermatology                | 95.46     | 93.82    | 96.64      | 96.48   | 93.85  | 96.53    | 96.44 |
| pima-diabetes              | 75.59     | 74.48    | 75.92      | 75.53   | 75.84  | 75.80    | 74.25 |
| ecoli                      | 84.82     | 84.70    | 84.79      | 85.09   | 84.11  | 84.67    | 84.22 |
| Glass                      | 73.33     | 74.37    | 72.48      | 73.10   | 72.32  | 72.30    | 76.87 |
| haberman                   | 69.05     | 70.44    | 73.40      | 71.68   | 73.99  | 73.44    | 62.69 |
| cleveland-14-heart-disease | 80.30     | 79.73    | 80.73      | 80.43   | 81.07  | 80.77    | 80.63 |
| hungarian-14-heart-disease | 78.96     | 79.46    | 82.13      | 79.54   | 80.86  | 82.29    | 79.63 |
| heart-statlog              | 79.70     | 79.26    | 80.74      | 80.07   | 81.11  | 81.11    | 80.07 |
| hepatitis                  | 80.63     | 81.53    | 81.72      | 82.06   | 82.64  | 81.79    | 82.78 |
| hypothyroid                | 99.30     | 99.48    | 99.48      | 99.50   | 99.47  | 99.48    | 99.27 |
| ionosphere                 | 91.80     | 90.58    | 91.40      | 91.71   | 91.35  | 91.40    | 92.25 |
| iris                       | 93.80     | 94.20    | 93.87      | 94.00   | 94.33  | 93.87    | 90.33 |
| kr-vs-kp                   | 98.02     | 98.72    | 98.81      | 99.17   | 98.79  | 99.09    | 96.78 |
| letter                     | 93.56     | 92.56    | 93.32      | 93.43   | 91.10  | 93.19    | 94.38 |
| liver-disorders            | 70.47     | 69.43    | 68.66      | 70.09   | 69.97  | 68.37    | 69.43 |
| lymphography               | 79.58     | 77.02    | 78.69      | 78.63   | 78.10  | 78.75    | 83.29 |
| mfeat-pixel                | 83.09     | 86.71    | 83.89      | 83.14   | 87.27  | 84.01    | 96.46 |
| nursery                    | 96.27     | 97.11    | 96.95      | 97.12   | 96.08  | 96.69    | 97.80 |
| optdigits                  | 95.70     | 95.81    | 95.62      | 95.62   | 95.07  | 95.54    | 98.41 |
| page-blocks                | 97.11     | 97.20    | 97.20      | 97.22   | 97.20  | 97.20    | 96.57 |
| pendigits                  | 98.43     | 98.43    | 98.27      | 98.35   | 97.99  | 98.19    | 99.15 |
| primary-tumor              | 41.62     | 43.06    | 42.77      | 42.33   | 43.12  | 43.04    | 42.48 |
| segment                    | 96.75     | 97.08    | 97.10      | 97.14   | 96.49  | 97.04    | 95.96 |
| sick                       | 98.08     | 98.47    | 98.40      | 98.43   | 98.45  | 98.43    | 98.26 |
| solar-flare2               | 98.58     | 99.47    | 99.48      | 99.53   | 99.53  | 99.53    | 97.74 |
| sonar                      | 77.45     | 79.47    | 78.02      | 77.60   | 76.99  | 77.97    | 82.50 |
| soybean                    | 91.22     | 90.25    | 92.61      | 92.72   | 88.45  | 92.62    | 90.80 |
| spambase                   | 93.23     | 93.32    | 93.55      | 93.53   | 93.55  | 93.54    | 93.25 |
| spectrometer               | 55.42     | 51.85    | 54.16      | 55.67   | 50.58  | 54.16    | 57.27 |
| splice                     | 93.11     | 93.54    | 94.08      | 94.18   | 93.54  | 94.22    | 95.14 |
| Sponge                     | 91.39     | 92.68    | 93.00      | 92.34   | 92.50  | 92.57    | 93.11 |
| tae                        | 56.17     | 57.15    | 52.12      | 55.70   | 53.78  | 52.38    | 61.82 |
| vehicle                    | 73.88     | 73.54    | 72.96      | 74.15   | 72.42  | 72.98    | 74.17 |
| vote                       | 95.22     | 95.35    | 95.49      | 95.91   | 95.56  | 95.89    | 94.46 |
| vowel                      | 92.73     | 90.74    | 90.30      | 91.95   | 88.58  | 90.22    | 92.26 |
| waveform                   | 83.16     | 83.16    | 82.99      | 83.17   | 83.05  | 82.98    | 85.39 |
| wine                       | 94.44     | 94.50    | 94.77      | 94.60   | 94.54  | 94.77    | 97.25 |
| zoo                        | 93.66     | 93.37    | 93.27      | 93.77   | 93.77  | 93.27    | 93.18 |
| Average                    | 84.00     | 84.06    | 84.42      | 84.54   | 83.89  | 84.47    | 84.37 |

Table 3: Accuracy results of the methods when they are used on data sets with a percentage of added noise equal to 20%.

| Data set                   | BA-C4.5-U | BA-CDT-U | BA-CC4.5-U | BA-C4.5 | BA-CDT | BA-CC4.5 | RF    |
|----------------------------|-----------|----------|------------|---------|--------|----------|-------|
| anneal                     | 95.34     | 97.42    | 97.41      | 98.04   | 98.10  | 98.05    | 91.27 |
| arrhythmia                 | 73.87     | 72.84    | 74.87      | 74.25   | 72.02  | 74.91    | 66.33 |
| audiology                  | 76.25     | 75.57    | 78.81      | 78.37   | 72.84  | 79.12    | 71.60 |
| autos                      | 73.34     | 69.80    | 74.52      | 73.88   | 63.51  | 74.61    | 70.38 |
| balance-scale              | 79.26     | 80.97    | 82.09      | 81.37   | 83.25  | 82.08    | 74.93 |
| breast-cancer              | 63.40     | 66.20    | 67.74      | 70.95   | 69.94  | 71.10    | 62.72 |
| wisconsin-breast-cancer    | 93.41     | 94.00    | 95.91      | 94.91   | 96.22  | 95.98    | 91.39 |
| car                        | 85.43     | 89.72    | 89.76      | 89.82   | 89.76  | 90.02    | 90.57 |
| cmc                        | 48.38     | 50.14    | 50.93      | 50.39   | 53.21  | 51.54    | 46.33 |
| horse-colic                | 81.46     | 80.73    | 83.93      | 83.96   | 83.44  | 84.42    | 81.02 |
| credit-rating              | 79.41     | 82.67    | 84.03      | 83.58   | 85.42  | 85.03    | 80.29 |
| german-credit              | 69.91     | 71.38    | 70.82      | 71.90   | 73.85  | 71.64    | 72.49 |
| dermatology                | 92.73     | 93.52    | 95.46      | 95.39   | 94.01  | 95.63    | 95.35 |
| pima-diabetes              | 74.62     | 72.60    | 75.41      | 74.76   | 75.30  | 75.64    | 72.22 |
| ecoli                      | 82.56     | 82.91    | 83.81      | 83.06   | 83.81  | 83.78    | 80.92 |
| Glass                      | 70.61     | 72.67    | 70.75      | 70.71   | 71.33  | 70.57    | 73.44 |
| haberman                   | 66.55     | 66.33    | 70.98      | 68.45   | 71.80  | 72.79    | 59.43 |
| cleveland-14-heart-disease | 79.02     | 79.15    | 80.39      | 79.71   | 81.04  | 79.93    | 80.07 |
| hungarian-14-heart-disease | 78.14     | 78.36    | 81.99      | 79.34   | 80.79  | 81.96    | 78.17 |
| heart-statlog              | 76.93     | 76.81    | 79.00      | 78.11   | 79.04  | 79.48    | 77.44 |
| hepatitis                  | 79.35     | 79.95    | 80.88      | 80.63   | 81.38  | 81.20    | 80.53 |
| hypothyroid                | 98.34     | 99.37    | 99.36      | 99.29   | 99.36  | 99.40    | 98.80 |
| ionosphere                 | 87.84     | 86.70    | 89.44      | 88.01   | 90.41  | 89.41    | 88.61 |
| iris                       | 90.07     | 90.93    | 92.73      | 92.27   | 93.80  | 92.67    | 83.13 |
| kr-vs-kp                   | 92.68     | 95.63    | 95.75      | 97.50   | 97.99  | 97.43    | 90.67 |
| letter                     | 92.57     | 92.32    | 93.01      | 92.97   | 91.28  | 92.92    | 91.09 |
| liver-disorders            | 67.08     | 66.45    | 66.69      | 67.22   | 68.59  | 66.69    | 65.81 |
| lymphography               | 75.99     | 76.00    | 78.17      | 77.49   | 77.44  | 78.65    | 78.60 |
| mfeat-pixel                | 82.19     | 86.60    | 83.17      | 82.59   | 87.63  | 83.52    | 96.01 |
| nursery                    | 90.42     | 96.50    | 96.55      | 96.52   | 96.06  | 96.41    | 94.29 |
| optdigits                  | 95.73     | 96.07    | 95.74      | 95.75   | 95.41  | 95.68    | 98.24 |
| page-blocks                | 96.33     | 96.79    | 97.12      | 96.80   | 97.10  | 97.10    | 94.89 |
| pendigits                  | 98.08     | 98.19    | 98.17      | 98.16   | 97.93  | 98.13    | 98.91 |
| primary-tumor              | 40.20     | 41.03    | 41.71      | 41.26   | 42.80  | 42.39    | 41.09 |
| segment                    | 94.29     | 95.83    | 96.33      | 95.81   | 96.28  | 96.38    | 93.65 |
| sick                       | 96.14     | 97.87    | 97.99      | 97.29   | 98.29  | 98.10    | 97.12 |
| solar-flare2               | 96.45     | 99.23    | 99.15      | 99.52   | 99.53  | 99.51    | 94.96 |
| sonar                      | 74.77     | 76.27    | 76.06      | 74.86   | 76.22  | 76.06    | 79.58 |
| soybean                    | 88.07     | 87.70    | 92.21      | 91.93   | 85.51  | 92.42    | 85.65 |
| spambase                   | 90.39     | 89.95    | 92.26      | 91.13   | 92.78  | 92.31    | 89.63 |
| spectrometer               | 54.15     | 49.97    | 54.03      | 54.11   | 48.89  | 54.05    | 56.24 |
| splice                     | 90.87     | 91.50    | 92.12      | 92.87   | 92.87  | 92.92    | 92.98 |
| Sponge                     | 87.89     | 90.57    | 91.38      | 91.79   | 92.50  | 91.77    | 89.32 |
| tae                        | 53.13     | 54.80    | 51.21      | 53.27   | 50.48  | 51.02    | 54.60 |
| vehicle                    | 72.59     | 72.41    | 72.68      | 73.01   | 72.55  | 72.60    | 73.02 |
| vote                       | 92.59     | 93.93    | 93.93      | 95.17   | 95.49  | 95.24    | 90.50 |
| vowel                      | 88.88     | 84.42    | 88.31      | 89.17   | 84.80  | 88.26    | 84.70 |
| waveform                   | 82.70     | 82.80    | 82.82      | 82.71   | 83.08  | 82.82    | 85.12 |
| wine                       | 91.35     | 90.68    | 92.77      | 91.51   | 93.76  | 92.66    | 93.83 |
| zoo                        | 93.50     | 93.27    | 93.10      | 93.99   | 91.39  | 92.91    | 88.73 |
| Average                    | 81.50     | 82.15    | 83.27      | 83.11   | 83.01  | 83.58    | 81.33 |

Table 4: Accuracy results of the methods when they are used on data sets with a percentage of added noise equal to 30%.

| Data set                   | BA-C4.5-U | BA-CDT-U | BA-CC4.5-U | BA-C4.5 | BA-CDT | BA-CC4.5 | RF    |
|----------------------------|-----------|----------|------------|---------|--------|----------|-------|
| anneal                     | 89.44     | 93.97    | 94.70      | 95.99   | 97.54  | 96.36    | 83.85 |
| arrhythmia                 | 72.86     | 71.64    | 73.41      | 73.14   | 70.64  | 73.88    | 65.84 |
| audiology                  | 73.37     | 71.51    | 75.62      | 77.21   | 69.01  | 76.72    | 66.78 |
| autos                      | 64.32     | 62.54    | 68.31      | 64.91   | 57.87  | 68.80    | 61.88 |
| balance-scale              | 74.95     | 77.10    | 80.27      | 78.32   | 81.82  | 80.59    | 69.06 |
| breast-cancer              | 59.83     | 61.24    | 63.19      | 64.31   | 64.62  | 66.34    | 59.45 |
| wisconsin-breast-cancer    | 87.78     | 88.35    | 93.46      | 90.96   | 94.15  | 93.95    | 83.26 |
| car                        | 78.65     | 84.87    | 85.65      | 87.05   | 88.13  | 87.45    | 85.89 |
| cmc                        | 45.41     | 47.51    | 48.73      | 47.75   | 51.32  | 49.65    | 43.96 |
| horse-colic                | 76.04     | 75.16    | 79.67      | 80.43   | 78.12  | 71.75    | 75.05 |
| credit-rating              | 71.61     | 75.30    | 77.57      | 74.54   | 81.55  | 79.43    | 72.30 |
| german-credit              | 65.07     | 67.19    | 66.37      | 67.27   | 70.65  | 67.52    | 67.38 |
| dermatology                | 88.71     | 91.04    | 92.35      | 93.30   | 93.63  | 93.41    | 93.25 |
| pima-diabetes              | 70.80     | 67.50    | 73.68      | 71.09   | 71.53  | 73.72    | 66.99 |
| ecoli                      | 79.88     | 80.86    | 83.58      | 81.04   | 83.58  | 83.46    | 77.64 |
| Glass                      | 66.90     | 68.39    | 68.46      | 67.18   | 69.32  | 68.46    | 68.55 |
| haberman                   | 62.34     | 60.46    | 66.06      | 62.95   | 66.79  | 70.26    | 56.26 |
| cleveland-14-heart-disease | 75.60     | 76.57    | 78.49      | 77.41   | 80.14  | 78.52    | 76.12 |
| hungarian-14-heart-disease | 75.96     | 76.09    | 81.93      | 78.63   | 80.18  | 81.52    | 75.05 |
| heart-statlog              | 69.52     | 69.89    | 75.30      | 70.52   | 75.44  | 75.63    | 71.59 |
| hepatitis                  | 73.24     | 75.51    | 75.99      | 75.18   | 80.33  | 76.49    | 75.55 |
| hypothyroid                | 95.90     | 98.82    | 98.77      | 97.43   | 99.15  | 99.06    | 97.59 |
| ionosphere                 | 79.86     | 78.38    | 83.57      | 80.06   | 84.37  | 83.94    | 81.80 |
| iris                       | 81.73     | 84.13    | 89.20      | 84.80   | 91.67  | 89.47    | 73.60 |
| kr-vs-kp                   | 82.68     | 86.36    | 86.56      | 88.91   | 95.14  | 89.77    | 80.39 |
| letter                     | 90.29     | 91.30    | 91.91      | 91.93   | 91.30  | 92.21    | 86.59 |
| liver-disorders            | 61.66     | 61.44    | 61.71      | 61.89   | 63.61  | 62.01    | 60.63 |
| lymphography               | 73.02     | 73.14    | 76.13      | 75.82   | 76.53  | 76.00    | 72.50 |
| mfeat-pixel                | 81.81     | 87.03    | 83.18      | 82.61   | 88.30  | 83.56    | 95.41 |
| nursery                    | 81.74     | 93.42    | 94.23      | 95.32   | 95.64  | 95.60    | 87.55 |
| optdigits                  | 95.08     | 95.90    | 95.32      | 95.18   | 95.74  | 95.33    | 97.99 |
| page-blocks                | 94.22     | 95.73    | 96.80      | 95.28   | 97.05  | 96.84    | 91.81 |
| pendigits                  | 97.39     | 97.76    | 97.87      | 97.62   | 97.86  | 97.87    | 98.29 |
| primary-tumor              | 37.61     | 39.73    | 39.85      | 39.05   | 42.42  | 41.15    | 37.84 |
| segment                    | 90.50     | 93.15    | 94.84      | 92.33   | 95.99  | 95.09    | 90.51 |
| sick                       | 90.34     | 94.64    | 95.77      | 92.47   | 97.25  | 96.69    | 92.09 |
| solar-flare2               | 92.24     | 97.11    | 97.28      | 99.39   | 99.50  | 99.40    | 90.55 |
| sonar                      | 69.52     | 71.75    | 71.05      | 69.47   | 73.22  | 70.99    | 73.44 |
| soybean                    | 83.45     | 81.65    | 90.73      | 90.82   | 81.61  | 91.21    | 79.93 |
| spambase                   | 86.06     | 83.51    | 89.57      | 86.91   | 89.57  | 89.69    | 83.68 |
| spectrometer               | 51.62     | 47.97    | 52.28      | 51.89   | 47.05  | 52.28    | 54.67 |
| splice                     | 87.83     | 88.76    | 89.11      | 89.86   | 91.89  | 89.97    | 89.90 |
| Sponge                     | 77.45     | 84.05    | 82.27      | 89.16   | 91.95  | 86.88    | 81.52 |
| tae                        | 49.83     | 49.20    | 47.32      | 49.22   | 48.48  | 46.99    | 51.81 |
| vehicle                    | 70.13     | 70.36    | 71.25      | 70.45   | 72.02  | 71.45    | 70.51 |
| vote                       | 86.25     | 88.87    | 88.75      | 91.54   | 94.00  | 91.79    | 83.80 |
| vowel                      | 81.63     | 74.76    | 85.01      | 82.95   | 74.61  | 85.10    | 75.51 |
| waveform                   | 81.82     | 82.14    | 82.40      | 81.86   | 82.83  | 82.40    | 84.70 |
| wine                       | 85.63     | 85.69    | 89.12      | 85.97   | 92.91  | 89.06    | 90.34 |
| zoo                        | 89.71     | 90.71    | 90.50      | 91.31   | 90.53  | 91.41    | 82.00 |
| Average                    | 76.99     | 78.20    | 80.30      | 79.61   | 80.97  | 81.14    | 76.65 |

Table 5: Accuracy results of the methods when they are used on data sets with a percentage of added noise equal to 40%.

| Data set                   | BA-C4.5-U | BA-CDT-U | BA-CC4.5-U | BA-C4.5 | BA-CDT | BA-CC4.5 | RF    |
|----------------------------|-----------|----------|------------|---------|--------|----------|-------|
| anneal                     | 80.69     | 87.46    | 88.69      | 89.11   | 96.65  | 92.29    | 74.47 |
| arrhythmia                 | 69.56     | 70.07    | 69.34      | 70.07   | 67.57  | 71.2     | 64.25 |
| audiology                  | 66.31     | 60.64    | 72.52      | 72.34   | 60.2   | 74.31    | 60.43 |
| autos                      | 53.96     | 53.59    | 59.65      | 54.36   | 50.98  | 59.99    | 52.45 |
| balance-scale              | 65.70     | 69.10    | 75.04      | 69.8    | 78.24  | 75.86    | 60.05 |
| breast-cancer              | 53.26     | 54.14    | 55.64      | 56.02   | 57.15  | 57.26    | 53.71 |
| wisconsin-breast-cancer    | 75.72     | 73.16    | 84.16      | 79.23   | 83.39  | 85.48    | 68.87 |
| car                        | 68.86     | 76.19    | 77.37      | 83.32   | 85.42  | 83.63    | 78.64 |
| cmc                        | 42.41     | 44.33    | 44.45      | 44.19   | 49.14  | 45.84    | 41.02 |
| horse-colic                | 64.64     | 63.42    | 69.32      | 68.48   | 65.78  | 71.58    | 63.95 |
| credit-rating              | 60.59     | 61.03    | 63.65      | 62.96   | 64.65  | 65.58    | 61.17 |
| german-credit              | 57.51     | 59.63    | 58.96      | 58.86   | 62.57  | 59.71    | 59.37 |
| dermatology                | 83.33     | 85.41    | 87.62      | 88.38   | 91.74  | 89.62    | 89.20 |
| pima-diabetes              | 66.12     | 60.25    | 68.40      | 66.05   | 64.37  | 68.49    | 59.97 |
| ecoli                      | 74.69     | 76.33    | 80.30      | 76.06   | 82.69  | 80.68    | 71.99 |
| Glass                      | 61.45     | 62.87    | 64.07      | 62.05   | 67.52  | 64.2     | 61.73 |
| haberman                   | 56.14     | 55.44    | 58.39      | 56.24   | 57.1   | 60.62    | 53.06 |
| cleveland-14-heart-disease | 69.76     | 72.58    | 75.20      | 71.6    | 78.52  | 75.83    | 71.55 |
| hungarian-14-heart-disease | 73.51     | 72.42    | 80.94      | 76.92   | 79.56  | 80.9     | 70.08 |
| heart-statlog              | 62.07     | 61.56    | 64.59      | 63.3    | 65.96  | 64.67    | 62.33 |
| hepatitis                  | 62.77     | 63.98    | 66.71      | 65.3    | 69.43  | 68.1     | 65.43 |
| hypothyroid                | 90.62     | 97.44    | 96.84      | 92.82   | 98.91  | 97.46    | 94.70 |
| ionosphere                 | 67.79     | 66.60    | 72.41      | 68.39   | 71.52  | 72.72    | 68.48 |
| iris                       | 72.60     | 74.87    | 86.13      | 75.2    | 87.73  | 86.07    | 66.53 |
| kr-vs-kp                   | 67.81     | 69.83    | 70.06      | 71.52   | 80.02  | 72.24    | 66.05 |
| letter                     | 85.81     | 88.67    | 89.10      | 89.21   | 90.94  | 90.23    | 80.28 |
| liver-disorders            | 57.16     | 57.17    | 58.24      | 57.01   | 58.28  | 58.67    | 56.40 |
| lymphography               | 65.98     | 66.58    | 70.64      | 69.15   | 75.07  | 71.51    | 66.67 |
| mfeat-pixel                | 81.54     | 86.94    | 82.79      | 82.43   | 88.71  | 83.42    | 94.68 |
| nursery                    | 70.94     | 85.09    | 87.80      | 92.78   | 94.55  | 93.56    | 77.10 |
| optdigits                  | 93.99     | 95.56    | 94.46      | 94.23   | 95.82  | 94.52    | 97.48 |
| page-blocks                | 89.84     | 92.85    | 96.05      | 91.33   | 96.75  | 96.15    | 86.55 |
| pendigits                  | 95.76     | 96.70    | 97.03      | 96.16   | 97.69  | 97.09    | 96.91 |
| primary-tumor              | 34.53     | 36.51    | 37.22      | 35.86   | 40.53  | 38.61    | 33.60 |
| segment                    | 85.65     | 88.71    | 92.15      | 86.99   | 95.71  | 92.57    | 85.90 |
| sick                       | 76.76     | 80.85    | 85.46      | 78.64   | 87.27  | 87.38    | 77.52 |
| solar-flare2               | 85.62     | 90.37    | 90.66      | 98.69   | 98.6   | 98.71    | 83.25 |
| sonar                      | 60.66     | 62.10    | 62.30      | 60.52   | 62.16  | 62.35    | 63.21 |
| soybean                    | 74.85     | 69.30    | 86.09      | 86.89   | 73.66  | 88.5     | 70.76 |
| spambase                   | 76.70     | 70.98    | 82.02      | 77.74   | 77.3   | 82.31    | 71.98 |
| spectrometer               | 48.99     | 43.13    | 50.12      | 49.19   | 43.11  | 50.14    | 51.59 |
| splice                     | 82.91     | 84.34    | 84.40      | 84.97   | 89.2   | 85.23    | 85.68 |
| Sponge                     | 69.29     | 75.05    | 72.79      | 79.73   | 89.18  | 77.18    | 73.86 |
| tae                        | 46.17     | 45.71    | 43.48      | 45.9    | 43.17  | 43.22    | 46.52 |
| vehicle                    | 65.00     | 65.98    | 67.71      | 65.54   | 69.76  | 68.11    | 65.47 |
| vote                       | 73.54     | 75.62    | 76.20      | 79.39   | 83.92  | 79.85    | 70.94 |
| vowel                      | 71.84     | 65.65    | 78.47      | 73.27   | 63.14  | 78.54    | 65.74 |
| waveform                   | 79.59     | 80.21    | 80.84      | 79.65   | 81.78  | 80.84    | 83.57 |
| wine                       | 78.25     | 79.10    | 83.99      | 78.82   | 88.06  | 83.99    | 81.95 |
| zoo                        | 81.58     | 84.46    | 85.15      | 86.05   | 87.52  | 86.05    | 72.80 |
| Average                    | 70.02     | 71.2     | 74.51      | 73.25   | 75.77  | 75.86    | 69.60 |

Table 6: Average result of the accuracy of the different algorithms when they are built from data sets with added noise.

| Algorithm  | noise 0%     | noise 10%    | noise 20%    | noise 30%    | noise 40%    |
|------------|--------------|--------------|--------------|--------------|--------------|
| BA-C4.5-U  | 85.28        | 84.00        | 81.50        | 76.99        | 70.02        |
| BA-CDT-U   | 84.90        | 84.06        | 82.15        | 78.20        | 71.20        |
| BA-CC4.5-U | 84.98        | 84.42        | 83.27        | 80.30        | 74.51        |
| BA-C4.5    | 85.29        | <b>84.54</b> | 83.11        | 79.61        | 73.25        |
| BA-CDT     | 84.24        | 83.89        | 83.01        | 80.97        | 75.77        |
| BA-CC4.5   | 84.97        | 84.47        | <b>83.58</b> | <b>81.14</b> | <b>75.86</b> |
| RF         | <b>86.35</b> | 84.37        | 81.33        | 76.65        | 69.60        |

Table 7: Friedman’s ranks about the accuracy of the algorithms when they are applied on data sets with different percentages of added noise.

| Algorithm  | noise 0%    | noise 10%   | noise 20%   | noise 30%   | noise 40%   |
|------------|-------------|-------------|-------------|-------------|-------------|
| BA-C4.5-U  | 3.16        | 4.92        | 5.68        | 6.02        | 5.94        |
| BA-CDT-U   | 4.50        | 4.45        | 4.91        | 4.93        | 4.99        |
| BA-CC4.5-U | 4.07        | 3.62        | 3.15        | 3.42        | 3.32        |
| BA-C4.5    | 3.77        | <b>3.14</b> | 3.53        | 4.00        | 4.16        |
| BA-CDT     | 5.45        | 4.29        | 3.15        | 2.27        | 2.38        |
| BA-CC4.5   | 4.20        | 3.48        | <b>2.74</b> | <b>2.18</b> | <b>1.95</b> |
| RF         | <b>2.85</b> | 4.10        | 4.84        | 5.18        | 5.26        |

Table 8: p-values of the Nemenyi test about the accuracy on data sets without added noise. Nemenyi’s procedure rejects those hypotheses that have an unadjusted p-value  $\leq 0.002381$ .

| $i$ | algorithms                    | $p$      |
|-----|-------------------------------|----------|
| 21  | BA-CDT vs. <b>RF</b>          | 0        |
| 20  | <b>BA-C4.5-U</b> vs. BA-CDT   | 0        |
| 19  | <b>BA-C4.5</b> vs. BA-CDT     | 0.000101 |
| 18  | BA-CDT-U vs. <b>RF</b>        | 0.000134 |
| 17  | <b>BA-CC4.5-U</b> vs. BA-CDT  | 0.001403 |
| 16  | BA-CC4.5 vs. <b>RF</b>        | 0.00178  |
| 15  | <b>BA-C4.5-U</b> vs. BA-CDT-U | 0.001925 |
| 14  | BA-CDT vs. BA-CC4.5           | 0.003814 |
| 13  | BA-CC4.5-U vs. RF             | 0.004747 |
| 12  | BA-C4.5-U vs. BA-CC4.5        | 0.016078 |
| 11  | BA-CDT-U vs. BA-CDT           | 0.027891 |
| 10  | BA-C4.5 vs. RF                | 0.033222 |
| 9   | BA-C4.5-U vs. BA-CC4.5-U      | 0.035183 |
| 8   | BA-CDT-U vs. BA-C4.5          | 0.0911   |
| 7   | BA-C4.5-U vs. BA-C4.5         | 0.157987 |
| 6   | BA-C4.5 vs. BA-CC4.5          | 0.319611 |
| 5   | BA-CDT-U vs. BA-CC4.5-U       | 0.319611 |
| 4   | BA-C4.5-U vs. RF              | 0.473059 |
| 3   | BA-CC4.5-U vs. BA-C4.5        | 0.487453 |
| 2   | BA-CDT-U vs. BA-CC4.5         | 0.487453 |
| 1   | BA-CC4.5-U vs. BA-CC4.5       | 0.763497 |

Table 9: p-values of the Nemenyi test about the accuracy on data sets with 10% of added noise. Nemenyi’s procedure rejects those hypotheses that have an unadjusted p-value  $\leq 0.002381$ .

| $i$ | algorithms                    | $p$      |
|-----|-------------------------------|----------|
| 21  | BA-C4.5-U vs. <b>BA-C4.5</b>  | 0.000038 |
| 20  | BA-C4.5-U vs. <b>BA-CC4.5</b> | 0.000859 |
| 19  | BA-CDT-U vs. BA-C4.5          | 0.002429 |
| 18  | BA-C4.5-U vs. BA-CC4.5-U      | 0.002622 |
| 17  | BA-C4.5 vs. BA-CDT            | 0.007774 |
| 16  | BA-CDT-U vs. BA-CC4.5         | 0.024761 |
| 15  | BA-C4.5 vs. RF                | 0.026285 |
| 14  | BA-CDT-U vs. BA-CC4.5-U       | 0.054722 |
| 13  | BA-C4.5-U vs. RF              | 0.057705 |
| 12  | BA-CDT vs. BA-CC4.5           | 0.060822 |
| 11  | BA-CC4.5-U vs. BA-CDT         | 0.120962 |
| 10  | BA-C4.5-U vs. BA-CDT          | 0.144795 |
| 9   | BA-CC4.5 vs. RF               | 0.151281 |
| 8   | BA-CC4.5-U vs. RF             | 0.266575 |
| 7   | BA-CC4.5-U vs. BA-C4.5        | 0.266575 |
| 6   | BA-C4.5-U vs. BA-CDT-U        | 0.276666 |
| 5   | BA-CDT-U vs. RF               | 0.417887 |
| 4   | BA-C4.5 vs. BA-CC4.5          | 0.431313 |
| 3   | BA-CDT vs. RF                 | 0.660108 |
| 2   | BA-CDT-U vs. BA-CDT           | 0.711138 |
| 1   | BA-CC4.5-U vs. BA-CC4.5       | 0.74591  |

Table 10: p-values of the Nemenyi test about the accuracy on data sets with 20% of added noise. Nemenyi's procedure rejects those hypotheses that have an unadjusted p-value  $\leq 0.002381$ .

| $i$ | algorithms                      | $p$      | $i$ | algorithms                      | $p$      |
|-----|---------------------------------|----------|-----|---------------------------------|----------|
| 21  | BA-C4.5-U vs. <b>BA-CC4.5</b>   | 0        | 21  | BA-C4.5-U vs. <b>BA-CC4.5</b>   | 0        |
| 20  | BA-C4.5-U vs. <b>BA-CC4.5-U</b> | 0        | 20  | BA-C4.5-U vs. <b>BA-CDT</b>     | 0        |
| 19  | BA-C4.5-U vs. <b>BA-CDT</b>     | 0        | 19  | <b>BA-CC4.5</b> vs. RF          | 0        |
| 18  | BA-CDT-U vs. <b>BA-CC4.5</b>    | 0.000001 | 18  | <b>BA-CDT</b> vs. RF            | 0        |
| 17  | BA-C4.5-U vs. <b>BA-C4.5</b>    | 0.000001 | 17  | BA-CDT-U vs. <b>BA-CC4.5</b>    | 0        |
| 16  | <b>BA-CC4.5</b> vs. RF          | 0.000001 | 16  | BA-CDT-U vs. <b>BA-CDT</b>      | 0        |
| 15  | BA-CDT-U vs. <b>BA-CC4.5-U</b>  | 0.000046 | 15  | BA-C4.5-U vs. <b>BA-CC4.5-U</b> | 0        |
| 14  | BA-CDT-U vs. <b>BA-CDT</b>      | 0.000046 | 14  | BA-C4.5-U vs. <b>BA-C4.5</b>    | 0.000003 |
| 13  | <b>BA-CC4.5-U</b> vs. RF        | 0.000092 | 13  | BA-C4.5 vs. <b>BA-CC4.5</b>     | 0.000025 |
| 12  | <b>BA-CDT</b> vs. RF            | 0.000092 | 12  | <b>BA-CC4.5-U</b> vs. RF        | 0.000046 |
| 11  | BA-CDT-U vs. <b>BA-C4.5</b>     | 0.001403 | 11  | BA-C4.5 vs. <b>BA-CDT</b>       | 0.000062 |
| 10  | BA-C4.5 vs. RF                  | 0.002429 | 10  | BA-CDT-U vs. <b>BA-CC4.5-U</b>  | 0.000474 |
| 9   | BA-C4.5-U vs. RF                | 0.051869 | 9   | BA-CC4.5-U vs. BA-CC4.5         | 0.004104 |
| 8   | BA-C4.5 vs. BA-CC4.5            | 0.067475 | 8   | BA-C4.5 vs. RF                  | 0.006311 |
| 7   | BA-C4.5-U vs. BA-CDT-U          | 0.074716 | 7   | BA-CC4.5-U vs. BA-CDT           | 0.007774 |
| 6   | BA-CC4.5-U vs. BA-CC4.5         | 0.342638 | 6   | BA-C4.5-U vs. BA-CDT-U          | 0.01164  |
| 5   | BA-CDT vs. BA-CC4.5             | 0.342638 | 5   | BA-CDT-U vs. BA-C4.5            | 0.031355 |
| 4   | BA-CC4.5-U vs. BA-C4.5          | 0.379114 | 4   | BA-C4.5-U vs. RF                | 0.051869 |
| 3   | BA-C4.5 vs. BA-CDT              | 0.379114 | 3   | BA-CC4.5-U vs. BA-C4.5          | 0.179454 |
| 2   | BA-CDT-U vs. RF                 | 0.871291 | 2   | BA-CDT-U vs. RF                 | 0.562834 |
| 1   | BA-CC4.5-U vs. BA-CDT           | 1        | 1   | BA-CDT vs. BA-CC4.5             | 0.834987 |

Table 11: p-values of the Nemenyi test about the accuracy on data sets with 30% of added noise. Nemenyi's procedure rejects those hypotheses that have an unadjusted p-value  $\leq 0.002381$ .

Table 12: p-values of the Nemenyi test about the accuracy on data sets with 40% of added noise. Nemenyi's procedure rejects those hypotheses that have an unadjusted p-value  $\leq 0.002381$ .

| $i$ | algorithms                      | $p$      |
|-----|---------------------------------|----------|
| 21  | BA-C4.5-U vs. <b>BA-CC4.5</b>   | 0        |
| 20  | BA-C4.5-U vs. <b>BA-CDT</b>     | 0        |
| 19  | <b>BA-CC4.5</b> vs. RF          | 0        |
| 18  | BA-CDT-U vs. <b>BA-CC4.5</b>    | 0        |
| 17  | <b>BA-CDT</b> vs. RF            | 0        |
| 16  | BA-C4.5-U vs. <b>BA-CC4.5-U</b> | 0        |
| 15  | BA-CDT-U vs. <b>BA-CDT</b>      | 0        |
| 14  | BA-C4.5 vs. <b>BA-CC4.5</b>     | 0        |
| 13  | <b>BA-CC4.5-U</b> vs. RF        | 0.000007 |
| 12  | BA-C4.5 vs. <b>BA-CDT</b>       | 0.000038 |
| 11  | BA-C4.5-U vs. <b>BA-C4.5</b>    | 0.000038 |
| 10  | BA-CDT-U vs. <b>BA-CC4.5-U</b>  | 0.000111 |
| 9   | BA-CC4.5-U vs. <b>BA-CC4.5</b>  | 0.001519 |
| 8   | <b>BA-C4.5</b> vs. RF           | 0.010896 |
| 7   | BA-C4.5-U vs. BA-CDT-U          | 0.027891 |
| 6   | BA-CC4.5-U vs. BA-CDT           | 0.029579 |
| 5   | BA-CC4.5-U vs. BA-C4.5          | 0.051869 |
| 4   | BA-CDT-U vs. BA-C4.5            | 0.054722 |
| 3   | BA-C4.5-U vs. RF                | 0.115512 |
| 2   | BA-CDT vs. BA-CC4.5             | 0.319611 |
| 1   | BA-CDT-U vs. RF                 | 0.532018 |



## 2 Post hoc comparison using Bonferroni-Dun's procedure

Bonferroni-Dunn's procedure rejects those hypotheses that have an unadjusted  $p$ -value  $\leq 0.008333$ . New significative differences found are noted with italic fonts.

Table 13:  $p$ -values of the Bonferroni-Dunn test about the accuracy on data sets without added noise, where Random Forest is the best method in the Friedman's rank.

| i | algorithm         | $p$ -value      |
|---|-------------------|-----------------|
| 1 | BA-CDT            | 0               |
| 2 | BA-CDT-U          | 0.000056        |
| 3 | BA-CC4.5          | 0.000727        |
| 4 | <i>BA-CC4.5-U</i> | <i>0.002622</i> |
| 5 | BA-C4.5           | 0.020638        |
| 6 | BA-C4.5-U         | 0.366699        |

Table 14:  $p$ -values of the Bonferroni-Dunn test about the accuracy on data sets with 10% of added noise, where Bagging of C4.5 is the best method in the Friedman's rank.

| i | algorithm     | $p$ -value      |
|---|---------------|-----------------|
| 1 | BA-C4.5-U     | 0.000034        |
| 2 | BA-CDT-U      | 0.002081        |
| 3 | <i>BA-CDT</i> | <i>0.006311</i> |
| 4 | <i>RF</i>     | <i>0.006769</i> |
| 5 | BA-CC4.5-U    | 0.237833        |
| 6 | BA-CC4.5      | 0.366699        |

Table 15:  $p$ -values of the Bonferroni-Dunn test about the accuracy on data sets with 20% of added noise, where Bagging of Credal-C4.5 is the best method in the Friedman's rank.

| i | algorithm  | $p$ -value |
|---|------------|------------|
| 1 | BA-C4.5-U  | 0          |
| 2 | RF         | 0          |
| 3 | BA-CDT-U   | 0.000001   |
| 4 | BA-C4.5    | 0.074716   |
| 5 | BA-CC4.5-U | 0.342638   |
| 6 | BA-CDT     | 0.366699   |

Table 16: p-values of the Bonferroni-Dunn test about the accuracy on data sets with 30% of added noise, where Bagging of Credal-C4.5 is the best method in the Friedman’s rank.

| i | algorithm         | $p$ -value      |
|---|-------------------|-----------------|
| 1 | BA-C4.5-U         | 0               |
| 2 | RF                | 0               |
| 3 | BA-CDT-U          | 0               |
| 4 | BA-C4.5           | 0.000038        |
| 5 | <i>BA-CC4.5-U</i> | <i>0.005479</i> |
| 6 | BA-CDT            | 0.799032        |

Table 17: p-values of the Bonferroni-Dunn test about the accuracy on data sets with 40% of added noise, where Bagging of Credal-C4.5 is the best method in the Friedman’s rank.

| i | algorithm  | $p$ -value |
|---|------------|------------|
| 1 | BA-C4.5-U  | 0          |
| 2 | RF         | 0          |
| 3 | BA-CDT-U   | 0          |
| 4 | BA-C4.5    | 0.000001   |
| 5 | BA-CC4.5-U | 0.00178    |
| 6 | BA-CDT     | 0.319611   |
